# Supplementary material for: Applicability and perspectives for DNA barcoding of soil invertebrates
Source: PeerJ journal article supplement (doi:10.7717/peerj.17709), 2024-07-24
Supplement: PeerJ_SI_Table1.pdf [file PeerJ_SI_Table1.pdf]

**Supplemental Table S1.** NCBI accession numbers and BOLD records of (A) 28S and (B) COI sequences used in this study.

**(A)**

| genus          | species       | NCBI accession numbers |    |          |
|----------------|---------------|------------------------|----|----------|
| Ceratophysella | denticulata   | KF684371               | to | KF684424 |
| Folsomia       | quadrioculata | KF684425               | to | KF684480 |
| Oppiella       | nova          | KF293514               | to | KF293639 |

**(B)**

**Collembola**

| genus          | species     | NCBI accession numbers |    |          | BOLD record |    |           |
|----------------|-------------|------------------------|----|----------|-------------|----|-----------|
| Ceratophysella | bengtssoni  | KT604455               |    |          |             |    |           |
| Ceratophysella | bengtssoni  | KT604511               |    |          |             |    |           |
| Ceratophysella | bengtssoni  | KT604772               |    |          |             |    |           |
| Ceratophysella | bengtssoni  | KT605154               |    |          |             |    |           |
| Ceratophysella | bengtssoni  | KT606390               |    |          |             |    |           |
| Ceratophysella | bengtssoni  | KT606675               |    |          |             |    |           |
| Ceratophysella | bengtssoni  | KT607623               |    |          |             |    |           |
| Ceratophysella | bengtssoni  | MG311538               |    |          |             |    |           |
| Ceratophysella | bengtssoni  | MG312803               |    |          |             |    |           |
| Ceratophysella | bengtssoni  | MG313923               |    |          |             |    |           |
| Ceratophysella | bengtssoni  | MG314680               |    |          |             |    |           |
| Ceratophysella | bengtssoni  | MG316132               |    |          |             |    |           |
| Ceratophysella | bengtssoni  | MG316593               |    |          |             |    |           |
| Ceratophysella | bengtssoni  | MG318406               |    |          |             |    |           |
| Ceratophysella | bengtssoni  | MG318574               |    |          |             |    |           |
| Ceratophysella | bengtssoni  | MG319029               |    |          |             |    |           |
| Ceratophysella | bengtssoni  | MG320085               |    |          |             |    |           |
| Ceratophysella | bengtssoni  |                        |    |          | NORCO464    | to | NORCO466  |
| Ceratophysella | communis    | MN432696               | to | MN432705 |             |    |           |
| Ceratophysella | communis    | MN432709               | to | MN432711 |             |    |           |
| Ceratophysella | communis    | MN432718               | to | MN432723 |             |    |           |
| Ceratophysella | communis    | MN432826               | to | MN432850 |             |    |           |
| Ceratophysella | comosa      | AB740020               | to | AB740026 |             |    |           |
| Ceratophysella | denticulata |                        |    |          | DKINV007    | to | DKINV010  |
| Ceratophysella | denticulata | KF684537               | to | KF684589 |             |    |           |
| Ceratophysella | denticulata |                        |    |          | NORCO056    | to | NORCO060  |
| Ceratophysella | denticulata |                        |    |          | TBGMIO01    | to |           |
| Ceratophysella | granulata   | HM399007               | to | HM399010 |             |    |           |
| Ceratophysella | granulata   | JX261875               |    |          |             |    |           |
| Ceratophysella | granulata   |                        |    |          | NORCO405    |    |           |
| Ceratophysella | granulata   |                        |    |          | TBGMIO23    |    |           |
| Ceratophysella | liguladorsi | LC406886               | to | LC406891 |             |    |           |
| Ceratophysella | liguladorsi | MN432730               | to | MN432733 |             |    |           |
| Ceratophysella | liguladorsi | MN432772               | to | MN432779 |             |    |           |
| Ceratophysella | longispina  |                        |    |          | ABSSI1724   | to | ABSSI1725 |
| Ceratophysella | longispina  |                        |    |          | ABSSI703    |    |           |
| Ceratophysella | longispina  |                        |    |          | ACHAR3791   |    |           |
| Ceratophysella | longispina  |                        |    |          | ACHAR3832   |    |           |
