# Supplementary material for: Applicability and perspectives for DNA barcoding of soil invertebrates
Source: PeerJ journal article supplement (doi:10.7717/peerj.17709), 2024-07-24
Supplement: PeerJ_SI_Table2.pdf [file PeerJ_SI_Table2.pdf]

**Supplemental Table S2. Assignment of ASAP COI lineages to the respective 28S rDNA haplotypes.** Sequences of 28S and COI are from the same individual and were available for one Oribatida species (*Oppiella nova*) and two Collembola species (*Ceratophysella denticulata*, *Folsomia quadrioculata*)

| <i>Oppiella nova</i>                   |                                       |                                       |
|----------------------------------------|---------------------------------------|---------------------------------------|
| 28S haplotype                          | Sequences belonging to haplotype 28S  | ASAP lineage (COI)                    |
| 1                                      | Oppiella_nova_Ger_HA_F_1_KF293514_1   | lineage_1                             |
|                                        | Oppiella_nova_Ger_HA_F_2_KF293515_1   | lineage_1                             |
|                                        | Oppiella_nova_Ger_HA_F_3_KF293516_1   | lineage_1                             |
|                                        | Oppiella_nova_Ger_HA_F_4_KF293517_1   | lineage_1                             |
|                                        | Oppiella_nova_Ger_KW_MG_2_KF293546_1  | lineage_2                             |
|                                        | Oppiella_nova_Ger_KW_IFG_2_KF293549_1 | lineage_3                             |
|                                        | Oppiella_nova_Ger_KW_IFG_3_KF293550_1 | lineage_2                             |
|                                        | Oppiella_nova_Ger_KW_MG_8_KF293575_1  | lineage_2                             |
|                                        | Oppiella_nova_Ger_KW_MG_12_KF293579_1 | lineage_2                             |
|                                        | Oppiella_nova_Ger_KW_MG_14_KF293581_1 | lineage_2                             |
|                                        | Oppiella_nova_Ger_KW_MG_15_KF293582_1 | lineages_6                            |
|                                        | Oppiella_nova_Ger_KW_MG_17_KF293584_1 | lineage_2                             |
|                                        | Oppiella_nova_Ger_KW_MG_18_KF293585_1 | lineage_2                             |
|                                        | Oppiella_nova_Ger_KW_MG_20_KF293587_1 | missing                               |
|                                        | Oppiella_nova_Ger_KW_MG_21_KF293588_1 | missing                               |
|                                        | Oppiella_nova_Ger_KW_MG_22_KF293589_1 | missing                               |
|                                        | Oppiella_nova_Ger_KW_MG_23_KF293590_1 | missing                               |
|                                        | Oppiella_nova_Ger_SO_F_6_KF293596_1   | lineage_1                             |
|                                        | Oppiella_nova_Ger_SO_MG_2_KF293600_1  | lineage_1                             |
|                                        | 2                                     | Oppiella_nova_Ger_HA_IFG_1_KF293518_1 |
| Oppiella_nova_Ger_HA_IFG_2_KF293519_1  |                                       | lineage_2                             |
| Oppiella_nova_Ger_HA_IFG_3_KF293520_1  |                                       | lineage_2                             |
| Oppiella_nova_Ger_HA_IFG_4_KF293521_1  |                                       | lineage_2                             |
| Oppiella_nova_Ger_HA_IFG_5_KF293522_1  |                                       | lineage_2                             |
| Oppiella_nova_Ger_HA_IFG_6_KF293523_1  |                                       | lineage_2                             |
| Oppiella_nova_Ger_HA_IFG_7_KF293524_1  |                                       | lineage_2                             |
| Oppiella_nova_Ger_HA_IFG_8_KF293525_1  |                                       | lineage_2                             |
| Oppiella_nova_Ger_HA_IFG_9_KF293526_1  |                                       | lineage_2                             |
| Oppiella_nova_Ger_HA_IFG_10_KF293527_1 |                                       | missing                               |
| Oppiella_nova_Ger_HA_IFG_11_KF293528_1 |                                       | missing                               |
| Oppiella_nova_Ger_KW_G_1_KF293530_1    |                                       | lineage_5                             |
| Oppiella_nova_Ger_KW_G_2_KF293543_1    |                                       | lineage_2                             |
| Oppiella_nova_Ger_KW_G_3_KF293544_1    |                                       | lineage_7                             |
| Oppiella_nova_Ger_KW_G_5_KF293556_1    |                                       | lineage_2                             |
| Oppiella_nova_Ger_KW_G_6_KF293557_1    |                                       | lineage_7                             |
| Oppiella_nova_Ger_KW_G_10_KF293561_1   |                                       | lineage_7                             |
| Oppiella_nova_Ger_KW_G_11_KF293562_1   |                                       | lineage_2                             |
| Oppiella_nova_Ger_KW_G_12_KF293563_1   |                                       | lineage_7                             |
| Oppiella_nova_Ger_KW_G_14_KF293565_1   |                                       | lineage_5                             |
| Oppiella_nova_Ger_KW_G_15_KF293566_1   | lineage_7                             |                                       |
| Oppiella_nova_Ger_KW_G_18_KF293569_1   | lineage_7                             |                                       |
| Oppiella_nova_Ger_KW_G_20_KF293571_1   | missing                               |                                       |

|    |                                        |            |
|----|----------------------------------------|------------|
|    | Oppiella_nova_Ger_KW_MG_6_KF293573_1   | lineage_2  |
|    | Oppiella_nova_Ger_KW_MG_7_KF293574_1   | lineage_2  |
|    | Oppiella_nova_Ger_KW_MG_9_KF293576_1   | lineages_6 |
|    | Oppiella_nova_Ger_KW_MG_10_KF293577_1  | lineages_6 |
|    | Oppiella_nova_Ger_KW_MG_16_KF293583_1  | lineage_2  |
|    | Oppiella_nova_Ger_SO_MG_5_KF293603_1   | missing    |
|    | Oppiella_nova_Ger_SO_MG_6_KF293604_1   | missing    |
|    | Oppiella_nova_Ger_UE_G_1_KF293610_1    | lineage_2  |
|    | Oppiella_nova_Ger_UE_G_2_KF293611_1    | lineage_2  |
|    | Oppiella_nova_Ger_UE_MG_1_KF293613_1   | lineage_2  |
|    | Oppiella_nova_Ger_UE_MG_2_KF293614_1   | lineage_2  |
|    | Oppiella_nova_Ger_UE_MG_3_KF293615_1   | lineage_2  |
|    | Oppiella_nova_Ger_UE_MG_4_KF293616_1   | missing    |
|    | Oppiella_nova_Ger_UE_MG_5_KF293617_1   | missing    |
|    | Oppiella_nova_Ger_UE_MG_7_KF293619_1   | missing    |
| 3  | Oppiella_nova_Ger_KW_F_1_KF293529_1    | lineage_3  |
| 4  | Oppiella_nova_Ger_KW_IFG_1_KF293532_1  | lineage_2  |
|    | Oppiella_nova_Ger_KW_F_6_KF293537_1    | lineage_1  |
|    | Oppiella_nova_Ger_KW_F_10_KF293541_1   | lineage_1  |
|    | Oppiella_nova_Ger_KW_MG_11_KF293578_1  | lineage_2  |
|    | Oppiella_nova_Ger_UE_IFG_9_KF293628_1  | lineage_1  |
| 5  | Oppiella_nova_Ger_KW_F_2_KF293533_1    | lineage_3  |
| 6  | Oppiella_nova_Ger_KW_F_3_KF293534_1    | lineage_3  |
| 7  | Oppiella_nova_Ger_KW_F_4_KF293535_1    | lineage_1  |
|    | Oppiella_nova_Ger_KW_F_14_KF293554_1   | missing    |
|    | Oppiella_nova_Ger_KW_MG_13_KF293580_1  | lineage_2  |
|    | Oppiella_nova_Ger_KW_MG_19_KF293586_1  | lineage_2  |
|    | Oppiella_nova_Ger_TW_F_1_KF293608_1    | lineage_8  |
|    | Oppiella_nova_Ger_UE_IFG_7_KF293626_1  | lineage_1  |
| 8  | Oppiella_nova_Ger_KW_F_5_KF293536_1    | lineage_4  |
| 9  | Oppiella_nova_Ger_KW_F_7_KF293538_1    | lineage_3  |
| 10 | Oppiella_nova_Ger_KW_F_8_KF293539_1    | lineage_4  |
| 11 | Oppiella_nova_Ger_KW_F_9_KF293540_1    | lineage_4  |
|    | Oppiella_nova_Ger_KW_F_13_KF293553_1   | missing    |
|    | Oppiella_nova_Ger_TW_F_2_KF293606_1    | lineage_3  |
|    | Oppiella_nova_Ger_UE_IFG_3_KF293622_1  | lineage_1  |
|    | Oppiella_nova_Ger_UE_IFG_13_KF293632_1 | lineage_3  |
| 12 | Oppiella_nova_Ger_KW_MG_1_KF293545_1   | lineage_2  |
|    | Oppiella_nova_Ger_KW_MG_3_KF293547_1   | lineage_6  |
|    | Oppiella_nova_Ger_KW_MG_4_KF293548_1   | lineage_2  |
| 13 | Oppiella_nova_Ger_KW_F_11_KF293551_1   | lineage_3  |
| 14 | Oppiella_nova_Ger_KW_F_12_KF293552_1   | lineage_1  |
| 15 | Oppiella_nova_Ger_KW_G_4_KF293555_1    | lineage_2  |
|    | Oppiella_nova_Ger_KW_G_8_KF293559_1    | lineage_7  |
|    | Oppiella_nova_Ger_KW_G_9_KF293560_1    | lineage_7  |
|    | Oppiella_nova_Ger_KW_G_13_KF293564_1   | lineage_2  |
|    | Oppiella_nova_Ger_KW_G_16_KF293567_1   | lineage_7  |
|    | Oppiella_nova_Ger_KW_G_17_KF293568_1   | lineage_2  |

|                                        |                                        |           |
|----------------------------------------|----------------------------------------|-----------|
| 16                                     | Oppiella_nova_Ger_KW_G_7_KF293558_1    | lineage_7 |
|                                        | Oppiella_nova_Ger_KW_MG_5_KF293572_1   | lineage_6 |
|                                        | Oppiella_nova_Ger_SO_F_8_KF293598_1    | missing   |
|                                        | Oppiella_nova_Ger_UE_G_3_KF293612_1    | lineage_6 |
|                                        | Oppiella_nova_Ger_UE_MG_6_KF293618_1   | missing   |
| 17                                     | Oppiella_nova_Ger_KW_G_19_KF293570_1   | lineage_7 |
| 18                                     | Oppiella_nova_Ger_SO_F_1_KF293591_1    | lineage_3 |
| 19                                     | Oppiella_nova_Ger_SO_F_2_KF293592_1    | lineage_1 |
|                                        | Oppiella_nova_Ger_SO_F_3_KF293593_1    | lineage_3 |
|                                        | Oppiella_nova_Ger_SO_F_4_KF293594_1    | lineage_1 |
|                                        | Oppiella_nova_Ger_UE_IFG_19_KF293638_1 | lineage_1 |
| 20                                     | Oppiella_nova_Ger_SO_F_5_KF293595_1    | lineage_1 |
| 21                                     | Oppiella_nova_Ger_SO_F_7_KF293597_1    | lineage_1 |
|                                        | Oppiella_nova_Ger_UE_IFG_4_KF293623_1  | lineage_1 |
|                                        | Oppiella_nova_Ger_UE_IFG_15_KF293634_1 | lineage_1 |
| 22                                     | Oppiella_nova_Ger_SO_MG_1_KF293599_1   | lineage_2 |
|                                        | Oppiella_nova_Ger_SO_MG_4_KF293602_1   | lineage_2 |
| 23                                     | Oppiella_nova_Ger_SO_MG_3_KF293601_1   | lineage_1 |
| 24                                     | Oppiella_nova_Ger_TW_F_1_KF293605_1    | lineage_8 |
| 25                                     | Oppiella_nova_Ger_TW_F_3_KF293607_1    | lineage_8 |
| 26                                     | Oppiella_nova_Ger_TW_IFG_1_KF293609_1  | missing   |
| 27                                     | Oppiella_nova_Ger_UE_IFG_1_KF293620_1  | lineage_3 |
| 28                                     | Oppiella_nova_Ger_UE_IFG_2_KF293621_1  | lineage_1 |
|                                        | Oppiella_nova_Ger_UE_IFG_11_KF293630_1 | lineage_1 |
| 29                                     | Oppiella_nova_Ger_UE_IFG_5_KF293624_1  | lineage_1 |
|                                        | Oppiella_nova_Ger_UE_IFG_6_KF293625_1  | lineage_1 |
|                                        | Oppiella_nova_Ger_UE_IFG_8_KF293627_1  | lineage_3 |
|                                        | Oppiella_nova_Ger_UE_IFG_10_KF293629_1 | lineage_3 |
|                                        | Oppiella_nova_Ger_UE_IFG_12_KF293631_1 | lineage_1 |
|                                        | Oppiella_nova_Ger_UE_IFG_14_KF293633_1 | lineage_1 |
|                                        | Oppiella_nova_Ger_UE_IFG_16_KF293635_1 | lineage_3 |
|                                        | Oppiella_nova_Ger_UE_IFG_17_KF293636_1 | lineage_1 |
| Oppiella_nova_Ger_UE_IFG_20_KF293639_1 | lineage_1                              |           |
| 30                                     | Oppiella_nova_Ger_UE_IFG_18_KF293637_1 | lineage_1 |

### *Ceratophysella denticulata*

| 28S haplotype | Sequences belonging to haplotype 28S      | ASAP lineage (COI) |
|---------------|-------------------------------------------|--------------------|
| 1             | Ceratophysella_denticulata_Aus_1_KF684375 | lineage_19         |
|               | Ceratophysella_denticulata_Aus_2_KF684374 | lineage_19         |
|               | Ceratophysella_denticulata_Aus_3_KF684373 | lineage_19         |
|               | Ceratophysella_denticulata_Aus_4_KF684372 | lineage_19         |
|               | Ceratophysella_denticulata_Aus_5_KF684371 | missing            |
|               | Ceratophysella_denticulata_Fra_1_KF684383 | lineage_19         |
|               | Ceratophysella_denticulata_Fra_2_KF684382 | lineage_19         |
|               | Ceratophysella_denticulata_Fra_3_KF684381 | lineage_19         |
|               | Ceratophysella_denticulata_Fra_4_KF684380 | lineage_19         |
|               | Ceratophysella_denticulata_Fra_5_KF684379 | lineage_19         |

|   |                                           |             |
|---|-------------------------------------------|-------------|
| 2 | Ceratophysella_denticulata_Cro_1_KF684378 | missing     |
|   | Ceratophysella_denticulata_Cro_2_KF684377 | missing     |
|   | Ceratophysella_denticulata_Cro_3_KF684376 | missing     |
|   | Ceratophysella_denticulata_Ger_1_KF684388 | lineage_18  |
|   | Ceratophysella_denticulata_Ger_2_KF684387 | lineage_18  |
|   | Ceratophysella_denticulata_Ger_3_KF684386 | lineage_18  |
|   | Ceratophysella_denticulata_Ger_4_KF684385 | lineage_18  |
|   | Ceratophysella_denticulata_Ger_5_KF684384 | lineage_18  |
|   | Ceratophysella_denticulata_Nor_1_KF684406 | lineage_18  |
|   | Ceratophysella_denticulata_Nor_2_KF684405 | lineage_18  |
|   | Ceratophysella_denticulata_Nor_3_KF684404 | lineage_18  |
|   | Ceratophysella_denticulata_Nor_4_KF684403 | lineage_18  |
|   | Ceratophysella_denticulata_Nor_5_KF684402 | lineage_18  |
|   | Ceratophysella_denticulata_Pol_1_KF684410 | lineage_18  |
|   | Ceratophysella_denticulata_Pol_2_KF684409 | lineage_18  |
|   | Ceratophysella_denticulata_Pol_3_KF684408 | lineage_18  |
|   | Ceratophysella_denticulata_Pol_4_KF684407 | lineage_18  |
| 3 | Ceratophysella_denticulata_Gre_1_KF684393 | liineage_13 |
|   | Ceratophysella_denticulata_Gre_2_KF684392 | liineage_13 |
|   | Ceratophysella_denticulata_Gre_3_KF684391 | liineage_13 |
|   | Ceratophysella_denticulata_Gre_4_KF684390 | liineage_13 |
|   | Ceratophysella_denticulata_Gre_5_KF684389 | liineage_13 |
| 4 | Ceratophysella_denticulata_Ita_1_KF684396 | lineage_20  |
|   | Ceratophysella_denticulata_Ita_2_KF684395 | lineage_20  |
|   | Ceratophysella_denticulata_Ita_3_KF684394 | lineage_20  |
| 5 | Ceratophysella_denticulata_Mon_1_KF684401 | lineage_17  |
|   | Ceratophysella_denticulata_Mon_2_KF684400 | lineage_17  |
|   | Ceratophysella_denticulata_Mon_3_KF684399 | lineage_17  |
|   | Ceratophysella_denticulata_Mon_4_KF684398 | lineage_17  |
|   | Ceratophysella_denticulata_Mon_5_KF684397 | lineage_17  |
| 6 | Ceratophysella_denticulata_Rus_1_KF684415 | lineage_21  |
|   | Ceratophysella_denticulata_Rus_2_KF684414 | lineage_21  |
|   | Ceratophysella_denticulata_Rus_3_KF684413 | lineage_21  |
|   | Ceratophysella_denticulata_Rus_4_KF684412 | lineage_21  |
|   | Ceratophysella_denticulata_Rus_5_KF684411 | lineage_21  |
|   | Ceratophysella_denticulata_Ser_1_KF684420 | lineage_21  |
|   | Ceratophysella_denticulata_Ser_2_KF684419 | lineage_21  |
|   | Ceratophysella_denticulata_Ser_3_KF684418 | lineage_21  |
|   | Ceratophysella_denticulata_Ser_4_KF684417 | lineage_21  |
|   | Ceratophysella_denticulata_Ser_5_KF684416 | lineage_21  |
| 7 | Ceratophysella_denticulata_Spa_1_KF684424 | lineage_9   |
|   | Ceratophysella_denticulata_Spa_3_KF684422 | lineage_9   |
|   | Ceratophysella_denticulata_Spa_4_KF684421 | lineage_9   |
| 8 | Ceratophysella_denticulata_Spa_2_KF684423 | lineage_9   |

***Folsomia quadrioculata***

**28S haplotype Sequences belonging to haplotype 28S**

**ASAP lineage (COI)**

|                                         |                                         |            |
|-----------------------------------------|-----------------------------------------|------------|
| 1                                       | Folsomia_quadrioculata_Gre_1_KF684447_2 | lineage_33 |
|                                         | Folsomia_quadrioculata_Gre_2_KF684448_2 | lineage_33 |
|                                         | Folsomia_quadrioculata_Gre_3_KF684449_2 | lineage_34 |
|                                         | Folsomia_quadrioculata_Gre_4_KF684450_2 | lineage_34 |
|                                         | Folsomia_quadrioculata_Gre_5_KF684451_2 | lineage_34 |
|                                         | Folsomia_quadrioculata_Mon_1_KF684457_2 | lineage_37 |
|                                         | Folsomia_quadrioculata_Mon_2_KF684458_2 | lineage_37 |
|                                         | Folsomia_quadrioculata_Mon_3_KF684459_2 | lineage_37 |
|                                         | Folsomia_quadrioculata_Mon_4_KF684460_2 | lineage_37 |
|                                         | Folsomia_quadrioculata_Mon_5_KF684461_2 | lineage_37 |
| 2                                       | Folsomia_quadrioculata_Nor_1_KF684462_4 | lineage_29 |
|                                         | Folsomia_quadrioculata_Nor_2_KF684463_4 | lineage_29 |
|                                         | Folsomia_quadrioculata_Nor_3_KF684464_4 | lineage_29 |
|                                         | Folsomia_quadrioculata_Nor_4_KF684465_4 | lineage_29 |
|                                         | Folsomia_quadrioculata_Nor_5_KF684466_4 | lineage_29 |
| 3                                       | Folsomia_quadrioculata_Aus_1_KF684425_3 | lineage_18 |
|                                         | Folsomia_quadrioculata_Aus_2_KF684426_3 | lineage_18 |
|                                         | Folsomia_quadrioculata_Aus_3_KF684427_3 | lineage_18 |
|                                         | Folsomia_quadrioculata_Cro_1_KF684428_3 | lineage_19 |
|                                         | Folsomia_quadrioculata_Cro_2_KF684429_3 | lineage_19 |
|                                         | Folsomia_quadrioculata_Cro_3_KF684430_3 | lineage_19 |
|                                         | Folsomia_quadrioculata_Cro_4_KF684431_3 | lineage_20 |
|                                         | Folsomia_quadrioculata_Est_1_KF684432_3 | lineage_23 |
|                                         | Folsomia_quadrioculata_Est_2_KF684433_3 | lineage_23 |
|                                         | Folsomia_quadrioculata_Est_3_KF684434_3 | lineage_23 |
|                                         | Folsomia_quadrioculata_Est_4_KF684435_3 | lineage_23 |
|                                         | Folsomia_quadrioculata_Est_5_KF684436_3 | lineage_23 |
|                                         | Folsomia_quadrioculata_Fra_1_KF684437_3 | lineage_25 |
|                                         | Folsomia_quadrioculata_Fra_2_KF684438_3 | lineage_25 |
|                                         | Folsomia_quadrioculata_Fra_3_KF684439_3 | lineage_25 |
|                                         | Folsomia_quadrioculata_Fra_4_KF684440_3 | lineage_25 |
|                                         | Folsomia_quadrioculata_Fra_5_KF684441_3 | lineage_25 |
|                                         | Folsomia_quadrioculata_Ger_1_KF684442_3 | lineage_18 |
|                                         | Folsomia_quadrioculata_Ger_2_KF684443_3 | lineage_18 |
|                                         | Folsomia_quadrioculata_Ger_3_KF684444_3 | lineage_18 |
|                                         | Folsomia_quadrioculata_Ger_4_KF684445_3 | lineage_18 |
|                                         | Folsomia_quadrioculata_Ger_5_KF684446_3 | lineage_18 |
|                                         | Folsomia_quadrioculata_Ita_1_KF684452_3 | lineage_36 |
|                                         | Folsomia_quadrioculata_Ita_2_KF684453_3 | lineage_36 |
|                                         | Folsomia_quadrioculata_Ita_3_KF684454_3 | lineage_36 |
|                                         | Folsomia_quadrioculata_Ita_4_KF684455_3 | lineage_36 |
|                                         | Folsomia_quadrioculata_Ita_5_KF684456_3 | lineage_36 |
|                                         | Folsomia_quadrioculata_Rus_1_KF684467_3 | lineage_31 |
|                                         | Folsomia_quadrioculata_Rus_2_KF684468_3 | lineage_31 |
|                                         | Folsomia_quadrioculata_Rus_3_KF684469_3 | lineage_31 |
| Folsomia_quadrioculata_Rus_4_KF684470_3 | lineage_31                              |            |
| Folsomia_quadrioculata_Ser_1_KF684471_3 | lineage_38                              |            |
| Folsomia_quadrioculata_Ser_2_KF684472_3 | lineage_38                              |            |

|  |                                         |            |
|--|-----------------------------------------|------------|
|  | Folsomia_quadrioculata_Ser_3_KF684473_3 | lineage_38 |
|  | Folsomia_quadrioculata_Ser_4_KF684474_3 | lineage_38 |
|  | Folsomia_quadrioculata_Ser_5_KF684475_3 | lineage_38 |
|  | Folsomia_quadrioculata_Spa_1_KF684476_3 | lineage_41 |
|  | Folsomia_quadrioculata_Spa_2_KF684477_3 | lineage_41 |
|  | Folsomia_quadrioculata_Spa_3_KF684478_3 | lineage_41 |
|  | Folsomia_quadrioculata_Spa_4_KF684479_3 | lineage_41 |
|  | Folsomia_quadrioculata_Spa_5_KF684480_3 | lineage_41 |
